# Supplementary material for: White matter hyperintensities associated with progression of cerebral small vessel disease: a 7-year Chinese urban community study
Source: publisher site journal article supplement (doi:10.18632/aging.103154), 2020-05-10
Supplement: Supplementary file [file aging-v12i9-103154-supplementary-material-SD3.pdf]

## SUPPLEMENTARY TABLES

**Supplementary Table 1. Baseline characteristics of all individuals (n=350).**

|                                                   | Total (n=350)        | Followed (n=191)     | Not followed (n=131) | Death (n=28)         | P                |
|---------------------------------------------------|----------------------|----------------------|----------------------|----------------------|------------------|
| Demographics                                      |                      |                      |                      |                      |                  |
| Age, y, median (IQR)                              | 69.0(63.3 to 73.6)   | 68.1(63 to 72.6)     | 70(63.9 to 74.6)     | 71.9(66.3 to 74.9)   | <b>0.013</b>     |
| Sex, male, n (%)                                  | 159(45.4)            | 83(43.5)             | 61(46.6)             | 15(53.6)             | 0.572            |
| Education, y, median (IQR)                        | 12(9 to 14)          | 12(9 to 15)          | 12(9 to 14)          | 12(4.5 to 12)        | 0.088            |
| Vascular risk factors                             |                      |                      |                      |                      |                  |
| Body mass index, kg/m <sup>2</sup> , median (IQR) | 24.6(22.4 to 27.2)   | 24.5(21.9 to 27.3)   | 25.1(22.9 to 27.3)   | 23.9(22.4 to 26.4)   | 0.457            |
| ApoE ε4 carriers, n(%)                            | 48(14.0)             | 26(14.0)             | 18(13.8)             | 4(14.3)              | 0.998            |
| Current smoking, n (%)                            | 44(12.6)             | 21(11.0)             | 15(11.5)             | 8(28.6)              | <b>0.029</b>     |
| Hypertension, n (%)                               | 186(53.1)            | 90(47.1)             | 78(59.5)             | 18(64.3)             | <b>0.042</b>     |
| Diabetes, n (%)                                   | 47(13.4)             | 20(10.5)             | 21(16.0)             | 6(21.4)              | 0.154            |
| Hyperlipidemia, n (%)                             | 133(38.0)            | 74(38.7)             | 50(38.2)             | 9(32.1)              | 0.797            |
| Cardiogenic disease, n (%)                        | 41(11.7)             | 19(9.9)              | 16(12.0)             | 6(21.4)              | 0.206            |
| Medication use, n (%)                             |                      |                      |                      |                      |                  |
| Antihypertensive                                  | 172(49.1)            | 94(49.2)             | 61(46.6)             | 17(60.7)             | 0.397            |
| Antidiabetic                                      | 41(11.7)             | 23(12.0)             | 12(9.2)              | 6(21.4)              | 0.182            |
| Lipid lowering                                    | 18(5.1)              | 14(7.3)              | 3(2.3)               | 1(3.6)               | 0.120            |
| Antiplatelet / anticoagulation                    | 69(19.7)             | 48(25.1)             | 20(15.3)             | 1(3.6)               | <b>0.006</b>     |
| CSVD markers                                      |                      |                      |                      |                      |                  |
| WMH volume, %, median (IQR)                       | 0.38(0.18 to 0.78)   | 0.29(0.15 to 0.59)   | 0.46(0.22 to 0.93)   | 0.93(0.43 to 1.43)   | <b>&lt;0.001</b> |
| Lacunae, n (%)                                    | 56(16.0)             | 22(11.5)             | 29(22.1)             | 5(17.9)              | <b>0.024</b>     |
| CMBs, n (%) <sup>a</sup>                          | 44(13.8)             | 16(10.1)             | 23(17.6)             | 5(17.9)              | 0.301            |
| Extensive ePVS, n (%)                             | 52(14.9)             | 23(12.0)             | 24(18.3)             | 5(17.9)              | 0.267            |
| SVD score≥2, n(%) <sup>a</sup>                    | 56(17.7)             | 17(10.7)             | 33(25.4)             | 6(21.4)              | <b>0.004</b>     |
| Cognition, median (IQR)                           |                      |                      |                      |                      |                  |
| MMSE                                              | 29(28 to 30)         | 29(28 to 30)         | 29(27 to 30)         | 29.5(26.5 to 30)     | <b>0.034</b>     |
| Memory                                            | 0.06(-0.66 to 0.70)  | 0.31(-0.36 to 0.88)  | -0.29(-0.88 to 0.50) | -0.09(-0.84 to 0.42) | <b>&lt;0.001</b> |
| Language                                          | 0.25(-0.07 to 0.47)  | 0.36(-0.07 to 0.57)  | 0.14(-0.29 to 0.47)  | -0.07(-0.72 to 0.31) | <b>0.001</b>     |
| Spatial construction                              | -0.13(-0.61 to 0.59) | 0.11(-0.61 to 0.83)  | -0.13(-0.85 to 0.59) | -0.61(-1.33 to 0.35) | <b>&lt;0.001</b> |
| Attention                                         | -0.18(-0.80 to 0.57) | -0.02(-0.54 to 0.60) | -0.42(-1.06 to 0.14) | -0.60(-1.14 to 0.04) | <b>&lt;0.001</b> |
| Executive function                                | 0.07(-0.09 to 0.23)  | 0.07(-0.09 to 0.23)  | 0.07(-0.09 to 0.23)  | -0.01(-0.25 to 0.23) | 0.344            |

<sup>a</sup> For ratings of CMBs, 32 participants were additionally excluded based on missing T2\*-GRE at baseline.

Abbreviations: WMH = white matter hyperintensities; CMBs = cerebral microbleeds; ePVS = enlarged perivascular spaces; IQR = interquartile range CSVD = cerebral small vessel disease; SVD = small vessel disease; MMSE = Mini-Mental State Examination.

**Supplementary Table 2. Relationships between baseline CSVD markers (semi-quantitative) and progression of CSVD markers.**

|                                 | <b>Change of WMH (%)</b> | <b>Incident lacunes</b> | <b>Incident CMBs</b>   | <b>ePVS Progression</b> |
|---------------------------------|--------------------------|-------------------------|------------------------|-------------------------|
|                                 | $\beta$ (95%CI)          | OR (95%CI)              | OR (95%CI)             | OR (95%CI)              |
| <b>Model 1</b>                  |                          |                         |                        |                         |
| WMH Fazekas, per score increase | <b>0.10(0.05,0.15)</b>   | <b>2.14(1.20,3.79)</b>  | <b>1.92(1.29,2.84)</b> | <b>1.63(1.10,2.42)</b>  |
| Lacunes, per No. increase       | <b>0.12(0.02,0.23)</b>   | <b>2.99(1.35,6.61)</b>  | 1.28(0.63,2.59)        | 2.07(0.93,4.57)         |
| CMBs, per No. increase          | 0.01(-0.03,0.06)         | 0.65(0.29,1.50)         | 1.02(0.71,1.48)        | 0.88(0.63,1.23)         |
| ePVS, per score increase        | 0.03(-0.05,0.10)         | 0.75(0.30,1.89)         | 0.94(0.55,1.61)        | 0.22(0.11,0.44)         |
| <b>Model 2</b>                  |                          |                         |                        |                         |
| WMH Fazekas, per score increase | <b>0.11(0.06,0.17)</b>   | <b>2.15(1.16,3.99)</b>  | <b>1.84(1.23,2.75)</b> | <b>1.55(1.03,2.34)</b>  |
| Lacunes, per No. increase       | 0.09(-0.01,0.19)         | <b>3.04(1.30,7.09)</b>  | 1.27(0.61,2.66)        | 2.21(0.97,5.03)         |
| CMBs, per No. increase          | 0.02(-0.02,0.06)         | 0.64(0.25,1.62)         | 1.04(0.72,1.50)        | 0.87(0.62,1.22)         |
| ePVS, per score increase        | 0.02(-0.05,0.09)         | 0.75(0.29,1.95)         | 0.93(0.54,1.61)        | 0.22(0.11,0.44)         |
| <b>Model 3</b>                  |                          |                         |                        |                         |
| WMH Fazekas, per score increase | <b>0.11(0.05,0.16)</b>   | <b>3.06(1.38,6.77)</b>  | <b>1.81(1.19,2.74)</b> | <b>1.64(1.06,2.54)</b>  |
| Lacunes, per No. increase       | <b>0.11(0.01,0.22)</b>   | 2.39(0.85,6.70)         | 1.24(0.57,2.73)        | 2.01(0.83,4.87)         |
| CMBs, per No. increase          | 0.02(-0.02,0.06)         | 0.73(0.34,1.58)         | 1.02(0.72,1.44)        | 0.90(0.62,1.30)         |
| ePVS, per score increase        | 0.03(-0.04,0.10)         | 0.74(0.20,2.71)         | 0.79(0.43,1.44)        | 0.20(0.09,0.42)         |
| <b>Model 4</b>                  |                          |                         |                        |                         |
| WMH Fazekas, per score increase | <b>0.10(0.05,0.15)</b>   | <b>3.15(1.40,7.12)</b>  | <b>1.90(1.24,2.92)</b> | <b>1.69(1.08,2.65)</b>  |
| Lacunes, per No. increase       | <b>0.11(0.01,0.22)</b>   | 2.38(0.84,6.73)         | 1.24(0.56,2.75)        | 2.08(0.85,5.06)         |
| CMBs, per No. increase          | 0.02(-0.02,0.07)         | 0.72(0.34,1.53)         | 0.99(0.69,1.42)        | 0.93(0.64,1.36)         |
| ePVS, per score increase        | 0.03 (-0.05,0.10)        | 0.73(0.20,2.69)         | 0.78(0.42,1.44)        | 0.18(0.08,0.38)         |

Model 1: unadjusted. Model 2: adjusted for baseline age, sex and interval. Model 3: adjusted for baseline age, sex, interval, BMI, ApoE  $\epsilon$ 4 carrier, current smoking, hypertension, diabetes, hyperlipidemia, cardiogenic disease. Model 4: additionally adjusted for antihypertensive, antidiabetic, lipid lowering, and antiplatelet / anticoagulation medications. Abbreviations: CSVD = cerebral small vessel disease; WMH = white matter hyperintensities; CMBs = cerebral microbleeds; ePVS = enlarged perivascular spaces.

**Supplementary Table 3. Relationships between baseline SVD score and progression of CSVD markers.**

|                               | <b>Change of WMH (%)</b> | <b>Incident lacunes</b> | <b>Incident CMBs</b>   | <b>ePVS Progression</b> |
|-------------------------------|--------------------------|-------------------------|------------------------|-------------------------|
|                               | $\beta$ (95%CI)          | OR (95%CI)              | OR (95%CI)             | OR (95%CI)              |
| SVD score, per score increase |                          |                         |                        |                         |
| Model 1                       | <b>0.12(0.06,0.18)</b>   | <b>1.89(1.13,3.17)</b>  | <b>2.20(1.44,3.36)</b> | 1.25(0.86,1.81)         |
| Model 2                       | <b>0.13(0.07,0.18)</b>   | <b>1.83(1.06,3.18)</b>  | <b>2.11(1.36,3.28)</b> | 1.20(0.81,1.77)         |
| Model 3                       | <b>0.14(0.07,0.20)</b>   | <b>3.57(1.53,8.33)</b>  | <b>2.06(1.28,3.29)</b> | 1.37(0.89,2.09)         |
| Model 4                       | <b>0.14(0.08,0.20)</b>   | <b>3.67(1.57,8.57)</b>  | <b>2.14(1.32,3.45)</b> | 1.42(0.92,2.19)         |

Model 1: unadjusted. Model 2: adjusted for baseline age, sex and interval. Model 3: adjusted for baseline age, sex, interval, BMI, ApoE  $\epsilon$ 4 carrier, current smoking, hypertension, diabetes, hyperlipidemia, cardiogenic disease. Model 4: additionally adjusted for antihypertensive, antidiabetic, lipid lowering, and antiplatelet / anticoagulation medications. Abbreviations: SVD = small vessel disease; CSVD = cerebral small vessel disease; WMH = white matter hyperintensities; CMBs = cerebral microbleeds; ePVS = enlarged perivascular spaces.

**Supplementary Table 4. Relationships between baseline SVD score and change of cognitive function.**

|                               | Change of cognitive function |       |         |       |          |       |                      |       |           |       |                    |       |
|-------------------------------|------------------------------|-------|---------|-------|----------|-------|----------------------|-------|-----------|-------|--------------------|-------|
|                               | MMSE                         |       | Memory  |       | Language |       | Spatial construction |       | Attention |       | Executive function |       |
|                               | $\beta$                      | P     | $\beta$ | P     | $\beta$  | P     | $\beta$              | P     | $\beta$   | P     | $\beta$            | P     |
| SVD score, per score increase | -0.36                        | 0.083 | -0.10   | 0.328 | 0.01     | 0.908 | 0.19                 | 0.171 | 0.11      | 0.298 | -0.14              | 0.061 |

Adjusted for age, sex, interval, education years, ApoE  $\epsilon$ 4 carrier.

Abbreviations: SVD = small vessel disease; MMSE = Mini-Mental State Examination.

**Supplementary Table 5. Relationships between progression of SVD score and change of cognitive function.**

|                                           | Change of cognitive function |       |         |       |          |       |                      |       |           |       |                    |       |
|-------------------------------------------|------------------------------|-------|---------|-------|----------|-------|----------------------|-------|-----------|-------|--------------------|-------|
|                                           | MMSE                         |       | Memory  |       | Language |       | Spatial construction |       | Attention |       | Executive function |       |
|                                           | $\beta$                      | P     | $\beta$ | P     | $\beta$  | P     | $\beta$              | P     | $\beta$   | P     | $\beta$            | P     |
| SVD score progression, per score increase | -0.12                        | 0.558 | 0.04    | 0.630 | 0.02     | 0.822 | 0.27                 | 0.015 | 0.01      | 0.953 | -0.14              | 0.053 |

Adjusted for age, sex, interval, education years, ApoE  $\epsilon$ 4 carrier.

Abbreviations: SVD = small vessel disease; MMSE = Mini-Mental State Examination.

**Supplementary Table 6. Relationships between baseline CSVD markers and change in cognitive diagnosis.**

|                             | Change in cognitive diagnosis |           |         |
|-----------------------------|-------------------------------|-----------|---------|
|                             | OR                            | 95%CI     | P value |
| WMH volume, per 1% increase | 1.63                          | 0.64,4.16 | 0.304   |
| Lacunae, per No. increase   | 1.68                          | 0.80,3.52 | 0.172   |
| CMBs, per No. increase      | 0.55                          | 0.16,1.86 | 0.333   |
| ePVS, per score increase    | 1.11                          | 0.58,2.14 | 0.752   |

Adjusted for age, sex, interval, education years, ApoE  $\epsilon$ 4 carrier.

Abbreviations: CSVD = cerebral small vessel disease; WMH = white matter hyperintensities; CMBs = cerebral microbleeds; ePVS = enlarged perivascular spaces; OR = odds ratio; CI = confidence interval.

**Supplementary Table 7. Relationships between progression of CSVD markers and change in cognitive diagnosis.**

|                                       | Change in cognitive diagnosis |           |         |
|---------------------------------------|-------------------------------|-----------|---------|
|                                       | OR                            | 95%CI     | P value |
| Change of WMH volume, per 1% increase | 1.47                          | 0.43,5.06 | 0.543   |
| Incident lacunae, per No. increase    | 1.03                          | 0.63,1.68 | 0.912   |
| Incident CMBs, per No. increase       | 0.90                          | 0.71,1.15 | 0.408   |
| ePVS progression, per score increase  | 1.44                          | 0.72,2.91 | 0.306   |

Adjusted for age, sex, interval, education years, ApoE  $\epsilon$ 4 carrier.

Abbreviations: CSVD = cerebral small vessel disease; WMH = white matter hyperintensities; CMBs = cerebral microbleeds; ePVS = enlarged perivascular spaces; OR = odds ratio; CI = confidence interval.
